# Supplementary material for: Pollution Characteristics, Spatial Distribution, and Evaluation of Heavy Metal(loid)s in Farmland Soils in a Typical Mountainous Hilly Area in China
Source: MDPI journal article supplement (doi:10.3390/foods12030681), 2023-02-03
Supplement: s1 [file s1]

# Pollution characteristics, spatial distribution, and evaluation of heavy metal(loid)s in farmland soils in a typical mountainous hilly area of China

Guohui Shen<sup>1</sup>, Xin Ru<sup>1</sup>, Yanting Gu<sup>1</sup>, Wei Liu<sup>2</sup>, Kunzhen Wang<sup>1</sup>, Baiyi Li<sup>1</sup>, Yanzhi Guo<sup>3,\*</sup> and Juan Han<sup>1,\*</sup>

<sup>1</sup> Institute of Food and Nutrition Development, Ministry of Agriculture and Rural Affairs, Beijing 100081, China

<sup>2</sup> North China Geological Prospecting and Ecological Resources Monitoring Center (Hebei), Chengde 067000, China

<sup>3</sup> Department of Research Management, Chinese Academy of Agricultural Sciences, Beijing 100081, China

\* Correspondence: guoyanzhi@caas.cn (Y.G.); hanjuan@caas.cn (J.H.); Tel.: +86-10-8210-6427; Fax: +86-10-8210-5184

## Supplement

**Table S1.** Classification of pollution degrees

| Class | $P_i$    | Pollution degree       | $P_N$      | Pollution degree       | $I_{geo}$ | Pollution degree         | $EF_i$  | Pollution degree      | $E_r$      | Pollution degree             | RI         | Pollution degree |
|-------|----------|------------------------|------------|------------------------|-----------|--------------------------|---------|-----------------------|------------|------------------------------|------------|------------------|
| I     | $\leq 1$ | Safe                   | $\leq 0.7$ | Safe                   | $\leq 0$  | Unpolluted               | $< 1$   | No pollution          | $< 40$     | Low ecological risk          | $< 150$    | Low risk         |
| II    | (1,2]    | Warning Threshold      | (0.7,1]    | Warning Threshold      | (0,1]     | Unpolluted to moderately | (1,2)   | Minimal pollution     | [40,80)    | Moderate ecological risk     | [150,300)  | Moderate risk    |
| III   | (2,3]    | Slight Contamination   | (1,2]      | Slight Contamination   | (1,2]     | Moderately               | (2,5)   | Moderate pollution    | [80,160)   | Considerable ecological risk | [300,600)  | High risk        |
| IV    | (3,5]    | Moderate Contamination | (2,3]      | Moderate Contamination | (2,3]     | Moderately to strongly   | (5,20)  | Significant pollution | [160,320)  | High ecological risk         | $\geq 600$ | Extreme risk     |
| V     | $> 5$    | Severe Contamination   | $> 3$      | Severe Contamination   | (3,4]     | Strongly                 | (20,40) | very Strong pollution | $\geq 320$ | Extreme ecological risk      |            |                  |
| VI    |          |                        |            |                        | (4,5]     | Strongly to extremely    | $> 40$  | Extreme pollution     |            |                              |            |                  |
| VII   |          |                        |            |                        | $> 5$     | Extremely                |         |                       |            |                              |            |                  |
